# Supplementary material
Source: Springer Nature journal article supplement (https://www.springermedizin.de/resource/supplementary/12936_2011_1909_MOESM2_ESM.pdf/9542042)
Supplement: MOESM2 [file 9542042]

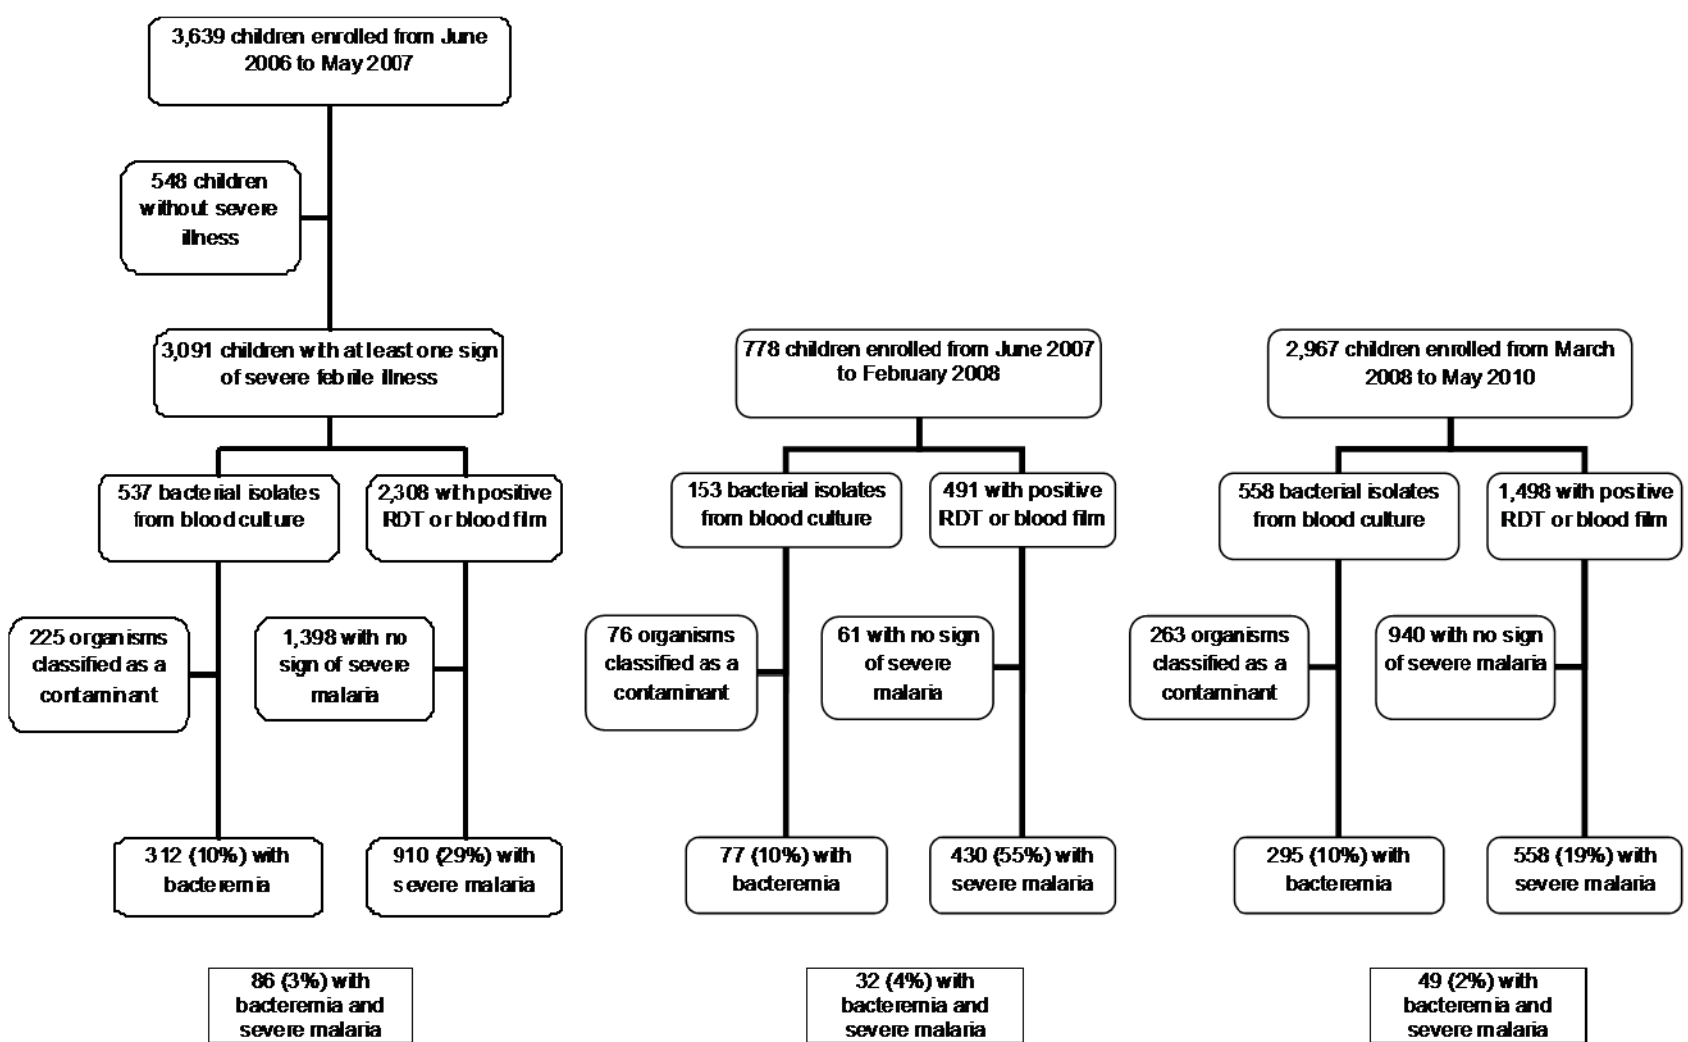

**COMBINED TOTAL:**

6,836 severely ill children were included in the analysis  
 1,248 (18%) with bacteria isolated from blood culture  
 564 (8%) with organisms classified as a contaminant  
 684 (10%) with pathogenic bacterial isolates  
 1,898 (28%) with severe falciparum malaria  
 167 (2%) with both bacteremia and severe malaria
